# Supplementary material
Source: PubMed Central journal article supplement (PMC6615960)
Supplement: NIHMS1024253-supplement-Supp_info.pdf [file NIHMS1024253-supplement-Supp_info.pdf]

## SUPPLEMENTARY INFORMATION

**Title:** The transcription factors ActR and SoxR differentially affect the phenazine tolerance of

*Agrobacterium tumefaciens*

**Authors:** Elena K. Perry, Dianne K. Newman

### List of contents:

- Table S1 - PYO-sensitive transposon insertion mutants identified in this study.
- Table S2 - Top 15 genes (by fold change) upregulated by PYO in WT.
- Table S3 - Genes that were expressed at least 2-fold more highly in  $\Delta actR$  than in WT only upon PYO treatment.
- Table S4 - Genes that were statistically significantly upregulated in  $\Delta actR$  vs. WT regardless of PYO treatment.
- Table S5 - Genes that were statistically significantly downregulated in  $\Delta actR$  vs. WT regardless of PYO treatment.
- Table S6 - Top six most highly expressed non-ribosomal genes in *A. tumefaciens* NT1 WT upon treatment with 100  $\mu$ M PYO.
- Figure S1 - Supplemental data from growth-based PYO sensitivity assays.
- Figure S2 - Structures and standard reduction potentials ( $E_0'$ ) of the redox-active molecules tested in this study.
- Figure S3 - Supplemental gradient plate assays.
- Figure S4 - Supplemental qRT-PCR data for SoxR regulon candidates and *cydA*.
- Figure S5 - Loss of ActR does not significantly alter the NADH/NAD<sup>+</sup> ratio or PYO-mediated cyanide-insensitive oxygen consumption rate.
- Figure S6 - Inhibition of ATP synthesis does not necessarily correlate with PYO sensitivity.
- Figure S7 - EPR spectra and DHE oxidation in the presence of PYO.
- Table S7 - Primers used in this study.
- Table S8 - Strains and plasmids used in this study.

**Table S1: PYO-sensitive transposon insertion mutants identified in this study.**

| Mutant      | Transposon Insertion Site  | Gene Product                                                                                                             |
|-------------|----------------------------|--------------------------------------------------------------------------------------------------------------------------|
| <i>soxR</i> | <i>soxR</i> , bp 6-7       | transcriptional regulator                                                                                                |
| <i>actS</i> | <i>actS</i> , bp 1007-1008 | two-component sensor kinase                                                                                              |
| <i>rpoH</i> | <i>rpoH</i> , bp 87-88     | RNA polymerase factor sigma-32                                                                                           |
| Atu1426     | Atu1426, bp 170-171        | enolase/phosphoenolpyruvate hydratase                                                                                    |
| Atu3738     | Atu3738, bp 11-12          | potassium/proton antiporter                                                                                              |
| <i>pykA</i> | <i>pykA</i> , bp 1129-1130 | pyruvate kinase                                                                                                          |
| Atu2584     | Atu2584, bp 548-549        | hypothetical protein with high sequence similarity to rhizobial NodB-like proteins that modify cell wall polysaccharides |
| Atu2590     | Atu2590, bp 35-36          | putative glycosyltransferase belonging to the MurG superfamily                                                           |
| Atu2591     | Atu2591, bp 42-43          | putative glycosyltransferase belonging to the RfaB superfamily                                                           |
| Atu2592     | Atu2592, bp 878-879        | putative glycosyltransferase belonging to the MurG superfamily                                                           |
| Atu2577-1   | Atu2577, bp 2288-2289      | ABC transporter, nucleotide binding/ATPase protein                                                                       |
| Atu2577-2   | Atu2577, bp 1010-1011      | ABC transporter, nucleotide binding/ATPase protein                                                                       |

**Table S2: Top 15 genes (by fold change) upregulated by PYO in WT.** The fold change is for PYO-treated cultures relative to cultures treated with the solvent control. Base Mean = mean of normalized transcript counts across all replicates and conditions. Bolded genes were previously computationally predicted to be regulated by SoxR on the basis of a SoxR box-containing promoter. Genes that were confirmed to be regulated by SoxR are highlighted in green.

| Gene                                     | Base Mean | Log <sub>2</sub> Fold Change | Adjusted p-value | Product                               |
|------------------------------------------|-----------|------------------------------|------------------|---------------------------------------|
| <b>Atu4582</b>                           | 8108      | 11.30                        | 2.22E-170        | ferredoxin                            |
| <b>Atu4581</b>                           | 3644      | 10.51                        | 1.89E-114        | putative flavin reductase             |
| <b>Atu4583</b><br><b>(<i>sodBII</i>)</b> | 106513    | 10.35                        | 0                | superoxide dismutase                  |
| Atu5305                                  | 1548      | 8.08                         | 9.83E-149        | hypothetical protein                  |
| <b>Atu2361</b>                           | 10590     | 7.74                         | 0                | MFS permease                          |
| <b>Atu5152</b>                           | 932       | 7.41                         | 1.60E-117        | hypothetical protein                  |
| Atu4742                                  | 4465      | 7.38                         | 0                | hypothetical protein                  |
| <b>Atu3915</b><br><b>(<i>soxR</i>)</b>   | 8621      | 7.27                         | 0                | MerR family transcriptional regulator |
| <b>Atu0942</b>                           | 29490     | 7.19                         | 0                | MFS permease                          |
| Atu4316                                  | 2029      | 4.98                         | 0                | ABC transporter permease              |
| <b>Atu2482</b><br><b>(<i>mexE</i>)</b>   | 34410     | 4.42                         | 0                | AcrB/AcrD/AcrF family protein         |
| <b>Atu2483</b><br><b>(<i>mexF</i>)</b>   | 19007     | 4.39                         | 0                | HlyD family secretion protein         |
| Atu1475                                  | 1784      | 4.08                         | 0                | hypothetical protein                  |
| <b>Atu4741</b>                           | 6479      | 4.06                         | 0                | putative transcriptional regulator    |
| Atu4366                                  | 343       | 3.86                         | 3.24E-82         | short chain dehydrogenase             |

**Table S3: Genes that were expressed at least 2-fold more highly in  $\Delta actR$  than in WT only upon PYO treatment.** The fold change is for  $\Delta actR$  relative to WT. Base Mean = mean of normalized transcript counts across all replicates and conditions.

| Gene    | Base Mean | Log2 Fold Change | Adjusted p-value | Product                                           |
|---------|-----------|------------------|------------------|---------------------------------------------------|
| Atu3298 | 542       | 2.95             | 9.59E-89         | C4-dicarboxylate transporter DctA                 |
| Atu4080 | 1096      | 2.31             | 2.21E-104        | glutamine amidotransferase                        |
| Atu2511 | 1697      | 2.17             | 5.82E-133        | D-alanine aminotransferase                        |
| Atu4311 | 90        | 1.85             | 6.14E-10         | sarcosine oxidase delta subunit                   |
| Atu4642 | 24522     | 1.60             | 3.41E-201        | catalase                                          |
| Atu2510 | 1005      | 1.54             | 5.97E-55         | aminopeptidase                                    |
| Atu3180 | 179       | 1.51             | 1.61E-12         | ABC transporter permease                          |
| Atu2733 | 132       | 1.50             | 1.79E-09         | hypothetical protein                              |
| Atu3329 | 2939      | 1.35             | 2.48E-79         | beta alanine-pyruvate transaminase                |
| Atu4732 | 324       | 1.25             | 2.32E-15         | fimbrial chaperone                                |
| Atu8166 | 341       | 1.21             | 4.54E-12         | hypothetical protein                              |
| Atu4073 | 1211      | 1.18             | 6.68E-38         | glycogen debranching protein                      |
| Atu4709 | 36        | 1.16             | 4.10E-03         | NAD-dependent formate dehydrogenase subunit delta |
| Atu2248 | 985       | 1.16             | 2.90E-30         | hypothetical protein                              |
| Atu3790 | 151       | 1.13             | 3.70E-07         | potassium-transporting ATPase subunit A           |
| Atu3340 | 250       | 1.12             | 2.74E-10         | trehalose/maltose ABC transporter permease        |
| Atu3472 | 87        | 1.10             | 1.04E-04         | 2-oxoisovalerate dehydrogenase subunit beta       |
| Atu0727 | 2186      | 1.09             | 3.92E-45         | ferredoxin I                                      |
| Atu3038 | 169       | 1.08             | 2.87E-07         | dipeptide ABC transporter ATPase                  |
| Atu0236 | 373       | 1.08             | 8.07E-13         | hypothetical protein                              |
| Atu0496 | 363       | 1.06             | 6.67E-12         | putative universal stress protein                 |
| Atu4077 | 4410      | 1.05             | 8.76E-59         | glycogen branching protein                        |
| Atu4076 | 1716      | 1.04             | 6.31E-38         | glucose-1-phosphate adenylyltransferase           |
| Atu4074 | 4597      | 1.02             | 3.87E-56         | phosphoglucomutase                                |
| Atu3039 | 358       | 1.02             | 1.32E-11         | hydantoinase beta subunit-like protein            |
| Atu3037 | 136       | 1.01             | 1.68E-05         | dipeptide ABC transporter permease                |
| Atu2477 | 1029      | 1.00             | 1.01E-23         | DNA oxidation protective protein                  |

**Table S4: Genes that were statistically significantly upregulated in  $\Delta actR$  vs. WT regardless of PYO treatment.** Values listed in the table are for PYO-treated  $\Delta actR$  relative to PYO-treated WT. Base Mean = mean of normalized transcript counts across all replicates and conditions. Genes are ordered by decreasing magnitude of fold change between  $\Delta actR$  and WT, and are highlighted with colors according to their function. **Pink** = genes related to the respiratory ETC; **green** = genes related to amino acid metabolism, including proteases; **blue** = genes related to sugar transport/metabolism; **purple** = genes related to fatty acid metabolism; **orange** = genes related to carbon oxidation, glycolysis, and the TCA cycle.

| Gene    | Base Mean | Log2 Fold Change | Adjusted p-value | Product                                                     |
|---------|-----------|------------------|------------------|-------------------------------------------------------------|
| Atu4090 | 2240      | 4.63             | 0.00E+00         | ABC transporter permease                                    |
| Atu4089 | 1925      | 3.75             | 0.00E+00         | ABC transporter permease                                    |
| Atu8036 | 554       | 2.92             | 1.07E-91         | protein YBGT-like protein                                   |
| Atu4092 | 2595      | 2.89             | 5.99E-246        | cytochrome d oxidase subunit II                             |
| Atu4081 | 2514      | 2.07             | 1.36E-120        | aspartate racemase                                          |
| Atu4314 | 552       | 2.05             | 7.30E-55         | serine hydroxymethyltransferase                             |
| Atu4091 | 3678      | 2.02             | 1.44E-124        | cytochrome d oxidase                                        |
| Atu4088 | 837       | 1.93             | 4.88E-70         | transcriptional regulator                                   |
| Atu0143 | 1520      | 1.92             | 9.53E-100        | MFS permease                                                |
| Atu4310 | 380       | 1.90             | 4.97E-36         | sarcosine oxidase beta subunit                              |
| Atu4313 | 180       | 1.83             | 1.29E-17         | sarcosine oxidase gamma subunit                             |
| Atu4447 | 306       | 1.73             | 5.54E-19         | sorbitol ABC transporter substrate-binding protein          |
| Atu4312 | 1016      | 1.67             | 5.02E-62         | sarcosine oxidase alpha subunit                             |
| Atu2249 | 567       | 1.62             | 8.95E-37         | hypothetical protein                                        |
| Atu3342 | 695       | 1.59             | 2.95E-41         | trehalose utilization-like protein                          |
| Atu4315 | 114       | 1.47             | 1.95E-08         | formyltetrahydrofolate deformylase                          |
| Atu3343 | 1005      | 1.35             | 3.64E-39         | trehalose utilization-like protein                          |
| Atu3341 | 325       | 1.34             | 1.06E-16         | trehalose/maltose ABC transporter ATPase                    |
| Atu0649 | 1691      | 1.33             | 8.93E-59         | cyclopropane-fatty-acyl-phospholipid synthase               |
| Atu4660 | 582       | 1.28             | 1.07E-25         | alpha-galactosidase                                         |
| Atu0543 | 7394      | 1.27             | 1.19E-104        | flaB                                                        |
| Atu3338 | 1077      | 1.21             | 2.33E-37         | trehalose/maltose ABC transporter substrate-binding protein |
| Atu0726 | 4368      | 1.15             | 2.40E-75         | ring hydroxylating dioxygenase, alpha-subunit               |
| Atu3471 | 350       | 1.15             | 3.85E-13         | branched-chain alpha-keto acid dehydrogenase subunit E2     |
| Atu3339 | 338       | 1.13             | 5.35E-13         | trehalose/maltose ABC transporter permease                  |
| Atu1338 | 2909      | 1.10             | 1.28E-09         | 3-oxoacyl-(acyl carrier protein) reductase                  |
| Atu4078 | 7728      | 1.01             | 4.18E-68         | glycogen phosphorylase                                      |
| Atu4661 | 277       | 0.99             | 4.95E-09         | alpha-galactoside ABC transporter substrate-binding protein |
| Atu2200 | 11449     | 0.98             | 6.88E-63         | cold shock protein                                          |
| Atu8170 | 9043      | 0.97             | 2.35E-60         | hypothetical protein                                        |

|         |       |      |          |                                                              |
|---------|-------|------|----------|--------------------------------------------------------------|
| Atu1567 | 1372  | 0.95 | 7.00E-25 | glutathione-independent formaldehyde dehydrogenase           |
| Atu1865 | 3965  | 0.93 | 1.17E-28 | hypothetical protein                                         |
| Atu5489 | 783   | 0.92 | 2.16E-13 | hypothetical protein                                         |
| Atu2631 | 2010  | 0.91 | 1.34E-30 | hypothetical protein                                         |
| Atu1632 | 9825  | 0.90 | 1.39E-52 | dimethylglycine dehydrogenase                                |
| Atu3894 | 180   | 0.87 | 3.03E-05 | sugar ABC transporter permease                               |
| Atu3506 | 2431  | 0.86 | 1.60E-27 | hypothetical protein                                         |
| Atu4442 | 496   | 0.84 | 9.55E-11 | hypothetical protein                                         |
| Atu0063 | 2389  | 0.83 | 6.24E-25 | ABC transporter, substrate binding protein (sugar)           |
| Atu0542 | 682   | 0.82 | 1.81E-12 | flagellin                                                    |
| Atu3474 | 279   | 0.82 | 9.90E-07 | acyl-CoA dehydrogenase                                       |
| Atu1174 | 1835  | 0.81 | 6.36E-24 | H <sup>+</sup> translocating pyrophosphate synthase          |
| Atu1805 | 4548  | 0.81 | 3.79E-36 | hypothetical protein                                         |
| Atu4708 | 534   | 0.78 | 5.77E-10 | formate dehydrogenase alpha subunit                          |
| Atu4727 | 756   | 0.75 | 2.47E-11 | hypothetical protein                                         |
| Atu5450 | 5849  | 0.73 | 5.59E-34 | hypothetical protein                                         |
| Atu3893 | 106   | 0.73 | 3.34E-03 | sugar ABC transporter permease                               |
| Atu5270 | 77    | 0.72 | 9.36E-03 | permease component of C4 dicarboxylate transporter           |
| Atu3336 | 1843  | 0.72 | 1.05E-19 | hypothetical protein                                         |
| Atu1864 | 4280  | 0.71 | 1.63E-18 | putative homoserine/homoserine lactone efflux protein        |
| Atu1777 | 6119  | 0.71 | 6.67E-30 | hypothetical protein                                         |
| Atu4728 | 8613  | 0.71 | 1.63E-05 | ABC transporter permease                                     |
| Atu5449 | 13865 | 0.71 | 7.79E-39 | heat-shock protein                                           |
| Atu0373 | 471   | 0.69 | 2.46E-07 | methyl-accepting chemotaxis protein                          |
| Atu3891 | 286   | 0.69 | 2.57E-05 | hypothetical protein                                         |
| Atu0738 | 1062  | 0.67 | 1.41E-10 | chemotaxis methyl-accepting protein                          |
| Atu4014 | 16149 | 0.67 | 2.87E-32 | transcriptional regulator                                    |
| Atu0591 | 12637 | 0.64 | 1.76E-29 | ABC transporter, substrate binding protein (alpha-glucoside) |
| Atu4061 | 732   | 0.63 | 1.99E-08 | exopolysaccharide production repressor protein               |
| Atu3895 | 170   | 0.62 | 2.91E-03 | sugar ABC transporter ATPase                                 |
| Atu1832 | 926   | 0.62 | 2.40E-09 | membrane protein associated metalloendopeptidase             |
| Atu0545 | 4409  | 0.61 | 1.79E-21 | flagella associated protein                                  |
| Atu0108 | 4839  | 0.60 | 1.98E-21 | putative metalloprotease M20 family                          |
| Atu0590 | 1735  | 0.60 | 6.22E-14 | transcriptional regulator repressor                          |
| Atu0064 | 549   | 0.60 | 1.70E-06 | ABC transporter, membrane spanning protein (sugar)           |
| Atu4062 | 736   | 0.60 | 8.80E-08 | hypothetical protein                                         |
| Atu0476 | 1401  | 0.59 | 1.48E-11 | aquaporin                                                    |
| Atu0517 | 1013  | 0.58 | 3.63E-09 | Chemotaxis protein histidine kinase                          |

|         |       |      |          |                                                                   |
|---------|-------|------|----------|-------------------------------------------------------------------|
| Atu2768 | 1085  | 0.58 | 7.83E-09 | hypothetical protein                                              |
| Atu0871 | 5443  | 0.57 | 1.06E-20 | branched-chain-amino-acid aminotransferase                        |
| Atu0984 | 1007  | 0.57 | 3.09E-08 | aminopeptidase N                                                  |
| Atu5052 | 22384 | 0.55 | 9.03E-20 | small heat shock protein                                          |
| Atu1661 | 1362  | 0.54 | 4.06E-09 | soluble pyridine nucleotide transhydrogenase                      |
| Atu5053 | 3354  | 0.53 | 6.22E-14 | hypothetical protein                                              |
| Atu3185 | 795   | 0.51 | 2.31E-06 | glycerol-3-phosphate ABC transporter substrate-binding protein    |
| Atu1392 | 15199 | 0.47 | 6.00E-19 | citrate synthase                                                  |
| Atu2617 | 1342  | 0.46 | 1.85E-07 | chemotaxis protein                                                |
| Atu3896 | 234   | 0.46 | 8.13E-03 | sugar ABC transporter ATPase                                      |
| Atu2644 | 2277  | 0.46 | 3.55E-09 | succinate dehydrogenase hydrophobic membrane anchor               |
| Atu8094 | 1653  | 0.44 | 8.99E-08 | hypothetical protein                                              |
| Atu2827 | 819   | 0.43 | 1.50E-04 | hypothetical protein                                              |
| Atu1405 | 617   | 0.43 | 3.02E-04 | transcriptional regulator, GntR family                            |
| Atu0526 | 2120  | 0.42 | 1.58E-07 | methyl-accepting chemotaxis protein                               |
| Atu1210 | 1939  | 0.42 | 3.05E-07 | putative 2,3-cyclic nucleotide 2-phosphodiesterase/3-nucleotidase |
| Atu3898 | 763   | 0.41 | 3.72E-04 | DeoR family transcriptional regulator                             |
| Atu0573 | 1619  | 0.40 | 5.35E-05 | transcriptional regulator                                         |
| Atu3596 | 5621  | 0.39 | 3.82E-10 | electron transfer flavoprotein alpha subunit                      |
| Atu2645 | 2303  | 0.36 | 3.61E-06 | succinate dehydrogenase cytochrome B-556 subunit                  |
| Atu2643 | 6452  | 0.36 | 1.25E-08 | succinate dehydrogenase flavoprotein subunit                      |
| Atu3595 | 3695  | 0.36 | 2.03E-07 | electron transfer flavoprotein subunit beta                       |
| Atu4319 | 2386  | 0.35 | 1.06E-05 | AraC family transcriptional regulator                             |
| Atu2196 | 5340  | 0.35 | 1.41E-08 | aspartate aminotransferase A                                      |
| Atu3695 | 4263  | 0.34 | 1.35E-07 | hypothetical protein                                              |
| Atu1616 | 9523  | 0.34 | 2.67E-09 | fumarate hydratase                                                |
| Atu0767 | 4159  | 0.33 | 1.20E-06 | cytochrome c oxidase subunit II                                   |
| Atu2239 | 1761  | 0.32 | 3.00E-04 | ubiquinol-cytochrome C reductase iron-sulfur subunit              |
| Atu2223 | 802   | 0.31 | 5.77E-03 | methyl-accepting chemotaxis protein                               |
| Atu2642 | 3397  | 0.31 | 1.61E-05 | succinate dehydrogenase iron-sulfur                               |
| Atu1717 | 869   | 0.29 | 5.89E-03 | long-chain fatty acid transport protein                           |
| Atu0594 | 3253  | 0.29 | 2.91E-05 | alpha-glucosidase                                                 |
| Atu1870 | 14872 | 0.28 | 2.98E-07 | isocitrate dehydrogenase                                          |
| Atu0768 | 5078  | 0.27 | 1.81E-04 | cytochrome-c oxidase chain I                                      |
| Atu2675 | 4519  | 0.26 | 5.78E-04 | hypothetical protein                                              |
| Atu3706 | 2778  | 0.26 | 1.00E-03 | D-3-phosphoglycerate dehydrogenase                                |
| Atu2685 | 14712 | 0.25 | 1.77E-05 | aconitate hydratase                                               |
| Atu1426 | 7399  | 0.24 | 1.01E-04 | enolase                                                           |

|         |       |      |          |                                                       |
|---------|-------|------|----------|-------------------------------------------------------|
| Atu2238 | 2861  | 0.22 | 3.24E-03 | ubiquinol-cytochrome c reductase cytochrome b subunit |
| Atu1307 | 1977  | 0.22 | 7.56E-03 | dihydroorotase                                        |
| Atu0592 | 2054  | 0.21 | 8.63E-03 | ABC transporter, membrane spanning protein            |
| Atu2348 | 6953  | 0.21 | 8.02E-04 | sugar binding protein                                 |
| Atu0977 | 51857 | 0.20 | 1.05E-03 | serine protease DO-like protease                      |
| Atu2682 | 17487 | 0.19 | 8.74E-04 | hypothetical protein                                  |

**Table S5: Genes that were statistically significantly downregulated in  $\Delta actR$  vs. WT regardless of PYO treatment.** Values listed in the table are for PYO-treated  $\Delta actR$  relative to PYO-treated WT. Base Mean = mean of normalized transcript counts across all replicates and conditions. Genes are ordered by decreasing magnitude of fold change between  $\Delta actR$  and WT. Genes mentioned in the main text because of their relevance to the respiratory ETC are highlighted in pink.

| Gene    | Base Mean | Log2 Fold Change | Adjusted p-value | Product                                                |
|---------|-----------|------------------|------------------|--------------------------------------------------------|
| Atu0142 | 2962      | -2.88            | 1.43E-295        | cytochrome o ubiquinol oxidase subunit II              |
| Atu0141 | 3309      | -2.53            | 8.03E-253        | cytochrome O ubiquinol oxidase subunit I               |
| Atu0140 | 874       | -2.46            | 5.49E-97         | cytochrome o ubiquinol oxidase subunit III             |
| Atu0138 | 89        | -2.36            | 6.03E-13         | surfeit 1                                              |
| Atu0139 | 645       | -2.27            | 5.64E-71         | cytochrome o ubiquinol oxidase subunit IV              |
| Atu4171 | 1181      | -1.70            | 4.77E-63         | cold-shock dead-box protein A                          |
| Atu4096 | 142       | -1.43            | 1.03E-08         | nicotinate-nucleotide pyrophosphorylase                |
| Atu1528 | 731       | -1.38            | 2.85E-27         | nitrogen fixation protein FixI                         |
| Atu2333 | 2854      | -1.37            | 9.58E-78         | ATP-dependent RNA helicase                             |
| Atu1529 | 238       | -1.36            | 3.00E-13         | nitrogen fixation protein FixH                         |
| Atu1155 | 400       | -1.32            | 1.98E-19         | hypothetical protein                                   |
| Atu3122 | 576       | -1.30            | 3.51E-21         | cold shock protein                                     |
| Atu4097 | 474       | -1.29            | 1.58E-21         | L-aspartate oxidase                                    |
| Atu1798 | 155       | -1.27            | 1.99E-08         | ankyrin repeat protein                                 |
| Atu3124 | 434       | -1.25            | 6.16E-17         | hypothetical protein                                   |
| Atu1221 | 984       | -1.23            | 3.30E-29         | hypothetical protein                                   |
| Atu1536 | 268       | -1.21            | 1.36E-11         | cytochrome C oxidase, FixO chain                       |
| Atu2112 | 168       | -1.20            | 3.81E-08         | soluble lytic transglycosylase                         |
| Atu1530 | 1171      | -1.17            | 2.85E-29         | nitrogen fixation protein FixG                         |
| Atu5384 | 640       | -1.15            | 4.16E-21         | hypothetical protein                                   |
| Atu4372 | 247       | -1.08            | 9.70E-09         | ribose ABC transporter permease                        |
| Atu1537 | 1510      | -1.04            | 8.66E-07         | cytochrome-c oxidase, FixN chain                       |
| Atu5126 | 740       | -1.03            | 1.10E-19         | ABC transporter nucleotide binding/ATPase(putrescine)  |
| Atu3998 | 220       | -1.00            | 1.62E-07         | 8-amino-7-oxononanoate synthase                        |
| Atu1535 | 58        | -0.99            | 3.28E-03         | cytochrome c oxidase, FixQ chain                       |
| Atu4695 | 595       | -0.99            | 4.94E-14         | oligopeptide ABC transporter substrate-binding protein |

|         |       |       |          |                                                                  |
|---------|-------|-------|----------|------------------------------------------------------------------|
| Atu3771 | 431   | -0.97 | 1.35E-11 | ferrochelatase                                                   |
| Atu0895 | 7152  | -0.95 | 9.15E-58 | ABC transporter, substrate binding protein                       |
| Atu1956 | 22144 | -0.94 | 1.01E-68 | DNA-directed RNA polymerase beta chain                           |
| Atu2273 | 651   | -0.93 | 1.92E-15 | hypothetical protein                                             |
| Atu3817 | 403   | -0.92 | 1.78E-10 | dehydratase                                                      |
| Atu2833 | 4918  | -0.92 | 1.04E-45 | transcription termination factor Rho                             |
| Atu1601 | 1118  | -0.91 | 1.03E-05 | oxygen-independent coproporphyrinogen III oxidase                |
| Atu5108 | 287   | -0.91 | 2.25E-07 | conjugal transfer coupling protein TraG                          |
| Atu2806 | 489   | -0.91 | 1.09E-11 | hypothetical protein                                             |
| Atu2804 | 2183  | -0.90 | 3.68E-31 | cobaltochelatase subunit                                         |
| Atu2805 | 1465  | -0.90 | 9.38E-26 | cobalamin synthesis protein                                      |
| Atu2283 | 816   | -0.88 | 1.60E-04 | pseudoazurin                                                     |
| Atu0885 | 176   | -0.88 | 1.96E-05 | hypothetical protein                                             |
| Atu1923 | 14379 | -0.87 | 3.51E-54 | DNA-directed RNA polymerase alpha subunit                        |
| Atu2803 | 698   | -0.84 | 2.56E-13 | Cobalamin biosynthesis associated protein                        |
| Atu2673 | 2180  | -0.83 | 1.25E-25 | hypothetical protein                                             |
| Atu4609 | 3074  | -0.82 | 1.15E-31 | glycosyltransferase                                              |
| Atu1771 | 286   | -0.81 | 1.27E-06 | hypothetical protein                                             |
| Atu5516 | 1337  | -0.81 | 6.38E-18 | hypothetical protein                                             |
| Atu3191 | 768   | -0.81 | 2.30E-10 | outer membrane protein                                           |
| Atu5162 | 590   | -0.80 | 1.34E-08 | type IV secretion protein AvhB1                                  |
| Atu1955 | 33189 | -0.79 | 1.03E-43 | DNA-directed RNA polymerase beta' chain                          |
| Atu0663 | 385   | -0.78 | 2.00E-07 | hypothetical protein                                             |
| Atu3121 | 8101  | -0.77 | 1.01E-39 | cold shock protein                                               |
| Atu1654 | 117   | -0.77 | 1.47E-03 | nitroreductase                                                   |
| Atu2183 | 2132  | -0.76 | 9.49E-23 | lipopolysaccharide core biosynthesis<br>mannosyltransferase      |
| Atu2801 | 780   | -0.76 | 9.76E-12 | precorrin-2 C20 methyltransferase                                |
| Atu2835 | 1143  | -0.76 | 1.37E-14 | uroporphyrinogen decarboxylase                                   |
| Atu2834 | 285   | -0.76 | 4.89E-06 | hypothetical protein                                             |
| Atu0107 | 369   | -0.75 | 1.61E-06 | hypothetical protein                                             |
| Atu1534 | 460   | -0.75 | 3.76E-07 | cytochrome-c oxidase, FixP chain                                 |
| Atu2085 | 5294  | -0.73 | 7.85E-32 | UDP-3-O-(3-hydroxymyristoyl) N-<br>acetylglucosamine deacetylase |
| Atu5127 | 414   | -0.70 | 7.90E-07 | ABC transporter membrane spanning protein<br>(mannopine)         |
| Atu0033 | 2568  | -0.69 | 3.74E-22 | two component sensor kinase                                      |
| Atu2824 | 935   | -0.69 | 9.89E-12 | hypothetical protein                                             |
| Atu0070 | 1714  | -0.69 | 4.02E-17 | ribonucleoside-diphosphate reductase 2 alpha chain               |
| Atu2394 | 3017  | -0.68 | 2.43E-03 | Regulator of Biofilm formation, Fnr Family                       |
| Atu2792 | 184   | -0.68 | 8.38E-04 | hypothetical protein                                             |

|         |       |       |          |                                                                             |
|---------|-------|-------|----------|-----------------------------------------------------------------------------|
| Atu5110 | 109   | -0.68 | 5.43E-03 | conjugal transfer protein                                                   |
| Atu0983 | 225   | -0.68 | 2.84E-04 | hypothetical protein                                                        |
| Atu3230 | 375   | -0.67 | 8.05E-06 | hypothetical protein                                                        |
| Atu0769 | 848   | -0.67 | 2.03E-10 | protoheme IX farnesyltransferase                                            |
| Atu5161 | 800   | -0.66 | 1.14E-07 | hypothetical protein                                                        |
| Atu2073 | 1393  | -0.66 | 1.39E-13 | membrane protein                                                            |
| Atu0365 | 744   | -0.66 | 3.21E-09 | hypothetical protein                                                        |
| Atu2710 | 1129  | -0.65 | 7.82E-11 | hypothetical protein                                                        |
| Atu4667 | 534   | -0.64 | 4.78E-07 | ABC transporter permease                                                    |
| Atu0250 | 344   | -0.64 | 2.61E-05 | hypothetical protein                                                        |
| Atu4608 | 4774  | -0.64 | 3.10E-24 | hypothetical protein                                                        |
| Atu4098 | 778   | -0.64 | 1.90E-08 | quinolinate synthetase                                                      |
| Atu2026 | 1377  | -0.64 | 1.39E-12 | exodeoxyribonuclease V                                                      |
| Atu8135 | 2663  | -0.64 | 5.43E-16 | hypothetical protein                                                        |
| Atu2800 | 556   | -0.63 | 4.80E-07 | precorrin-3B C17-methyltransferase                                          |
| Atu2471 | 136   | -0.61 | 6.53E-03 | hypothetical protein                                                        |
| Atu0106 | 11129 | -0.60 | 2.10E-23 | cold shock protein                                                          |
| Atu0345 | 1829  | -0.60 | 8.82E-14 | DNA mismatch repair protein, MutS family                                    |
| Atu0034 | 4246  | -0.60 | 5.26E-21 | two component response regulator                                            |
| Atu0071 | 839   | -0.59 | 2.42E-08 | ribonucleoside-diphosphate reductase 2 beta chain                           |
| Atu2287 | 144   | -0.59 | 6.48E-03 | outer membrane heme receptor                                                |
| Atu3203 | 2501  | -0.58 | 4.53E-15 | RND multidrug efflux membrane permease                                      |
| Atu5130 | 355   | -0.58 | 9.65E-05 | attachment protein                                                          |
| Atu0012 | 7125  | -0.58 | 1.20E-21 | DNA gyrase subunit B                                                        |
| Atu0032 | 266   | -0.58 | 6.08E-04 | hypothetical protein                                                        |
| Atu2730 | 7718  | -0.56 | 3.48E-21 | beta (1-->2) glucan biosynthesis protein                                    |
| Atu5129 | 1722  | -0.56 | 5.08E-12 | ABC transporter substrate binding protein (mannopine)                       |
| Atu5001 | 1437  | -0.56 | 1.90E-10 | replication protein B                                                       |
| Atu4666 | 677   | -0.56 | 2.11E-05 | HlyD family secretion protein                                               |
| Atu5128 | 444   | -0.55 | 8.22E-05 | ABC transporter membrane spanning protein (mannopine)                       |
| Atu1447 | 3047  | -0.55 | 7.51E-15 | two component sensor kinase                                                 |
| Atu3229 | 259   | -0.54 | 1.86E-03 | hypothetical protein                                                        |
| Atu1658 | 1096  | -0.53 | 5.86E-08 | conserved protein involved in phosphoglycerol modification of cyclic glucan |
| Atu0973 | 1235  | -0.53 | 6.64E-09 | cycH protein                                                                |
| Atu2303 | 694   | -0.53 | 3.47E-06 | hypothetical protein                                                        |
| Atu2494 | 443   | -0.52 | 1.39E-04 | NAD(P)+ transhydrogenase beta chain                                         |
| Atu1445 | 863   | -0.51 | 1.25E-06 | two component sensor kinase                                                 |
| Atu2129 | 380   | -0.51 | 4.90E-04 | hypothetical protein                                                        |

|         |       |       |          |                                                |
|---------|-------|-------|----------|------------------------------------------------|
| Atu3704 | 2031  | -0.51 | 1.03E-10 | hypothetical protein                           |
| Atu0721 | 2154  | -0.50 | 1.95E-10 | hypothetical protein                           |
| Atu3202 | 3935  | -0.49 | 5.04E-14 | RND multidrug efflux transporter               |
| Atu4491 | 1679  | -0.49 | 3.73E-09 | hypothetical protein                           |
| Atu2380 | 583   | -0.49 | 6.13E-05 | hypothetical protein                           |
| Atu4619 | 1063  | -0.49 | 3.67E-07 | ATP-dependent DNA helicase                     |
| Atu2320 | 487   | -0.49 | 2.30E-04 | transcriptional regulator, TetR family         |
| Atu5469 | 562   | -0.48 | 1.03E-04 | DNA polymerase IV                              |
| Atu3325 | 756   | -0.48 | 1.69E-05 | exopolysaccharide production protein           |
| Atu2057 | 2428  | -0.48 | 9.28E-11 | DNA helicase II                                |
| Atu5000 | 1652  | -0.48 | 6.13E-08 | replication protein A                          |
| Atu1262 | 16332 | -0.47 | 7.08E-14 | histone-like protein                           |
| Atu8200 | 3772  | -0.47 | 1.07E-10 | hypothetical protein                           |
| Atu1074 | 606   | -0.47 | 1.33E-04 | NAD/NADP dependent oxidoreductase              |
| Atu5170 | 283   | -0.47 | 7.31E-03 | type IV secretion protein AvhB9                |
| Atu0900 | 620   | -0.46 | 1.05E-04 | hypothetical protein                           |
| Atu5165 | 1769  | -0.46 | 5.78E-06 | type IV secretion protein AvhB4                |
| Atu1131 | 43210 | -0.46 | 3.23E-15 | outer membrane protein                         |
| Atu1683 | 1453  | -0.45 | 2.26E-07 | hypothetical protein                           |
| Atu0933 | 729   | -0.45 | 9.93E-05 | beta-lactamase class D                         |
| Atu1877 | 4170  | -0.45 | 4.18E-10 | OmpA family protein                            |
| Atu1242 | 1157  | -0.44 | 6.58E-06 | cytochrome oxidase assembly factor             |
| Atu2692 | 2234  | -0.44 | 1.19E-07 | intracellular septation protein                |
| Atu2728 | 4808  | -0.43 | 1.78E-09 | beta (1-->2) glucan export ATP-binding protein |
| Atu1602 | 891   | -0.43 | 9.86E-05 | transcriptional activator, Crp family          |
| Atu3396 | 4110  | -0.43 | 1.31E-09 | ABC transporter substrate-binding protein      |
| Atu1825 | 1610  | -0.43 | 5.53E-06 | cysteine desulfurase                           |
| Atu1467 | 436   | -0.42 | 2.00E-03 | hypothetical protein                           |
| Atu8142 | 743   | -0.42 | 4.95E-04 | hypothetical protein                           |
| Atu4026 | 14058 | -0.42 | 5.49E-13 | hypothetical protein                           |
| Atu5167 | 485   | -0.42 | 4.41E-03 | type IV secretion protein AvhB6                |
| Atu2163 | 6391  | -0.41 | 7.59E-12 | hypothetical protein                           |
| Atu2521 | 1143  | -0.41 | 2.85E-05 | Protein regulated by acid pH                   |
| Atu5122 | 806   | -0.41 | 1.92E-04 | 3-ketoacyl-ACP reductase                       |
| Atu2463 | 740   | -0.41 | 2.50E-04 | hypothetical protein                           |
| Atu2181 | 1052  | -0.41 | 2.85E-05 | hypothetical protein                           |
| Atu1077 | 1260  | -0.39 | 3.73E-05 | DNA repair protein                             |
| Atu3326 | 1373  | -0.39 | 5.38E-05 | exopolysaccharide production protein           |
| Atu0898 | 602   | -0.39 | 1.72E-03 | hypothetical protein                           |

|         |       |       |          |                                                                                |
|---------|-------|-------|----------|--------------------------------------------------------------------------------|
| Atu3295 | 803   | -0.39 | 5.08E-04 | hypothetical protein                                                           |
| Atu2653 | 450   | -0.39 | 5.00E-03 | Uroporphyrinogen III synthase HEM4                                             |
| Atu1874 | 11481 | -0.38 | 5.09E-09 | RecA protein                                                                   |
| Atu3507 | 2784  | -0.38 | 3.23E-07 | hypothetical protein                                                           |
| Atu2779 | 1792  | -0.36 | 8.78E-06 | gamma-glutamyl phosphate reductase                                             |
| Atu2652 | 1401  | -0.36 | 9.33E-05 | porphobilinogen deaminase                                                      |
| Atu5124 | 1920  | -0.35 | 1.17E-05 | glutamate-1-semialdehyde aminotransferase                                      |
| Atu0720 | 2876  | -0.35 | 5.42E-06 | ribonuclease HII                                                               |
| Atu2168 | 2744  | -0.35 | 1.69E-05 | DNA primase                                                                    |
| Atu2522 | 696   | -0.34 | 3.11E-03 | agrobacterium chromosomal virulence protein B                                  |
| Atu2780 | 1666  | -0.34 | 7.80E-05 | gamma-glutamyl kinase                                                          |
| Atu4499 | 683   | -0.33 | 3.99E-03 | hypothetical protein                                                           |
| Atu2001 | 7332  | -0.33 | 3.74E-07 | excinuclease ABC subunit B                                                     |
| Atu0974 | 639   | -0.32 | 7.84E-03 | cytochrome-c biosynthesis heme-carrier protein cycJ                            |
| Atu1780 | 1051  | -0.31 | 1.66E-03 | ATP-dependent DNA helicase                                                     |
| Atu1032 | 905   | -0.31 | 5.48E-03 | hypothetical protein                                                           |
| Atu0975 | 1765  | -0.30 | 4.18E-04 | cytochrome c-type synthesis protein                                            |
| Atu1395 | 2869  | -0.30 | 6.47E-05 | LexA repressor                                                                 |
| Atu0998 | 1891  | -0.30 | 5.05E-04 | undecaprenyl pyrophosphate phosphatase, possible bacitracin resistance protein |
| Atu4498 | 1078  | -0.29 | 3.11E-03 | hypothetical protein                                                           |
| Atu4178 | 2418  | -0.29 | 2.60E-04 | hypothetical protein                                                           |
| Atu5123 | 2497  | -0.28 | 2.42E-04 | acetolactate synthase catalytic subunit                                        |
| Atu1433 | 4200  | -0.28 | 7.83E-05 | arylesterase                                                                   |
| Atu1300 | 1132  | -0.26 | 7.31E-03 | MFS permease                                                                   |
| Atu1446 | 1385  | -0.26 | 3.78E-03 | two component response regulator                                               |
| Atu1028 | 6244  | -0.24 | 1.13E-04 | hypothetical protein                                                           |
| Atu1715 | 2517  | -0.20 | 9.33E-03 | exopolysaccharide production negative regulator                                |

**Table S6: Top six most highly expressed non-ribosomal genes in *A. tumefaciens* NT1 WT upon treatment with 100  $\mu$ M PYO.** Expression values were calculated in a manner similar to RPKM (reads per kilobase per million mapped reads) values except that they were normalized to the upper quartile of gene expression instead of total mapped reads (Tjaden, 2015).

| Gene          | Product                  | Expression |
|---------------|--------------------------|------------|
| <i>rnpB</i>   | RNase P RNA              | 53179      |
| <i>sodBII</i> | superoxide dismutase     | 25726      |
| <i>hspL</i>   | small heat shock protein | 15130      |
| Atu1020       | outer membrane protein   | 14239      |
| <i>groEL</i>  | GroEL chaperonin         | 13833      |
| <i>groES</i>  | co-chaperonin GroES      | 12884      |

**Fig. S1: Supplemental data from growth-based PYO sensitivity assays.** **A)** Growth of WT and PYO-sensitive transposon mutants after 24 hrs without PYO treatment. **B)** Growth of  $\Delta actS$  and  $\Delta actR$  after 24 hrs in the presence of different concentrations of PYO. **C)** Growth of WT pLacZ (vector control for overexpression constructs),  $\Delta actR$  pLacZ,  $\Delta actR$  pActR (overexpression vector for ActR),  $\Delta soxR$  pLacZ, and  $\Delta soxR$  pSoxR (overexpression vector for SoxR) after 24 hrs in the presence of different concentrations of PYO, showing complementation of the  $\Delta actR$  and  $\Delta soxR$  clean deletion mutants. Expression from the vectors was induced by adding 1 mM IPTG at the start of the experiment. **D)** Growth of WT,  $\Delta sodBII$ ,  $\Delta cyo$ , and  $\Delta cyo/\Delta sodBII$  after 24 hrs in the presence of different concentrations of PYO, showing that  $\Delta cyo$  is slightly more dependent on SodBII than WT (i.e. it does not gain as large of a growth advantage upon loss of SodBII). Error bars in all panels represent standard deviations of biological replicates ( $n = 3$ ).

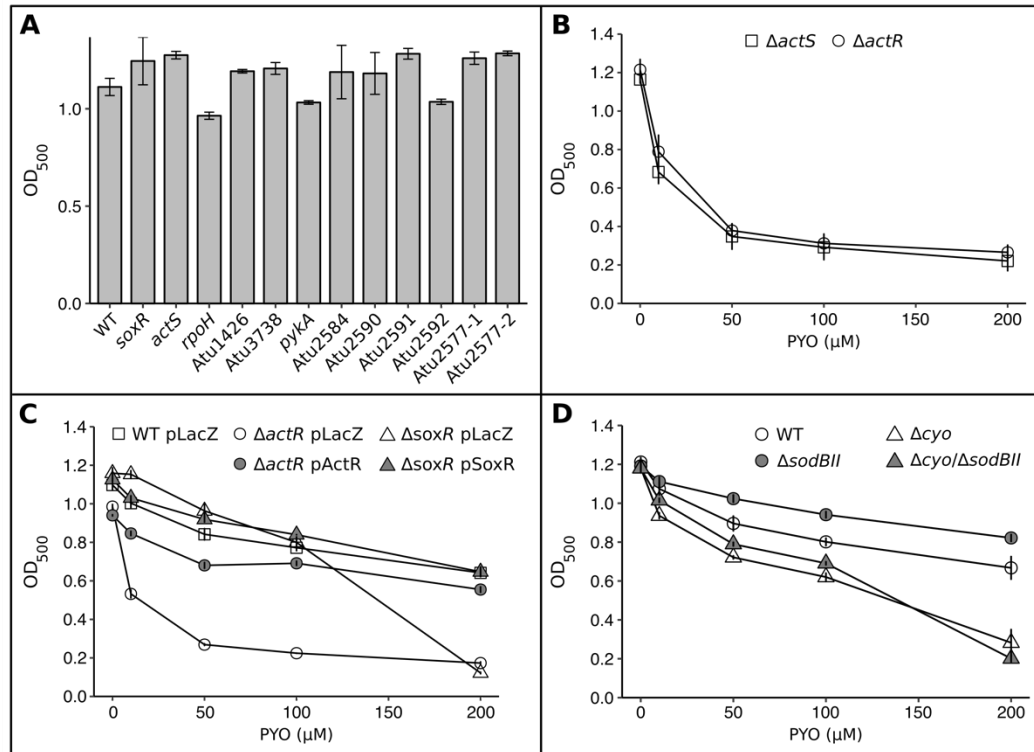

**Fig. S2: Structures and standard reduction potentials ( $E_0'$ ) of the redox-active molecules tested in this study.** Reduction potentials are versus that of the normal hydrogen electrode (NHE).

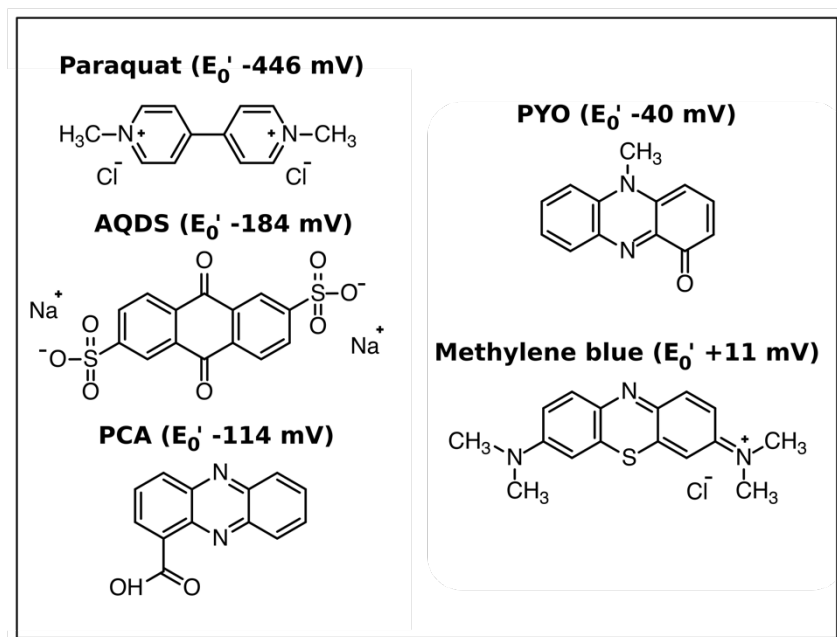

**Fig. S3: Supplemental gradient plate assays.** Growth of WT,  $\Delta actR$ , and  $\Delta soxR$  on agar plates containing either plain LB or a concentration gradient (low-high, left to right) of EDTA (up to 1 mM), myo-inositol (up to 1 M), or NaCl (up to 0.4 M). Images are representative of eight biological replicates.

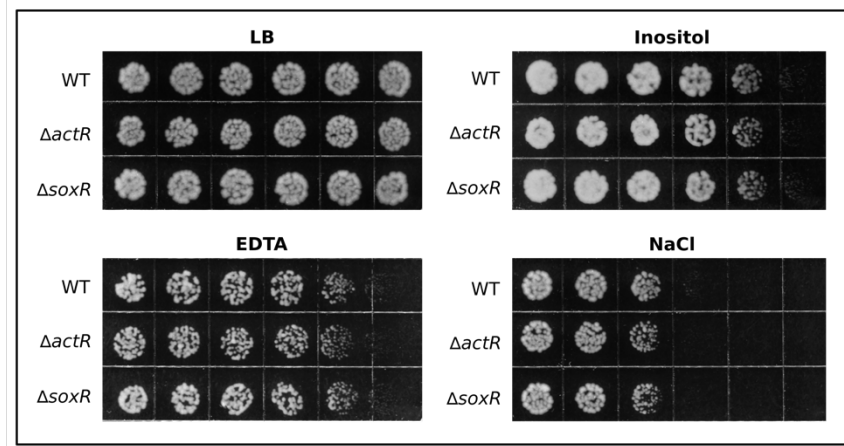

**Fig. S4: Supplemental qRT-PCR data for SoxR regulon candidates and *cydA*.** **A)** Relative induction by 100  $\mu$ M PYO of *Atu1475*, *Atu4316*, and *Atu4895* in WT and  $\Delta$ *soxR*, showing that these three genes are not regulated by SoxR. **B)** Relative expression of *cydA* in WT,  $\Delta$ *actR*, and  $\Delta$ *cyo* without PYO treatment. Expression was normalized to the housekeeping gene *rpoD*.

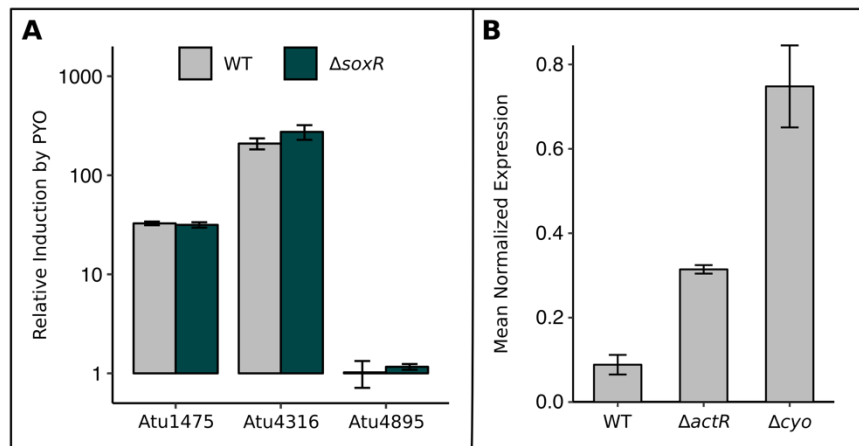

**Fig. S5: Loss of ActR does not significantly alter the NADH/NAD<sup>+</sup> ratio or PYO-mediated cyanide-insensitive oxygen consumption rate.** **A)** NADH and NAD<sup>+</sup> were extracted and quantified from exponential phase cultures of WT and  $\Delta$ *actR*. The slight increase in the mean NADH/NAD<sup>+</sup> ratio in  $\Delta$ *actR* is not statistically significant ( $p > 0.05$ , Welch's t-test,  $n = 4$ ). **B)** Exponential phase cultures of WT or  $\Delta$ *actR* in LB were treated with 5 mM potassium cyanide for 5 min to inhibit terminal oxidase activity; this concentration was sufficient to fully inhibit respiration. After 5 min, 10  $\mu$ M PYO was added, and after another 5 min, an additional 90  $\mu$ M PYO was added. The concentration of oxygen over time is plotted such that  $t = 0$  is approximately the time of the second PYO addition. The concentration of oxygen over time was also plotted for a blank sample (cell-free) with a similar starting concentration of oxygen. Each sample was fitted with a linear regression. The positive slope of the blank reference represents the rate of oxygen leakage into the system. The slope for the culture samples is a function of the leak rate minus the consumption rate. Hence, PYO-mediated oxygen consumption resulted in shallower slopes for the culture samples compared to the blank sample, although their rates of oxygen consumption were slower than the rate of oxygen leakage back into the system (resulting in a net positive slope). Two biological replicates are plotted for each strain.

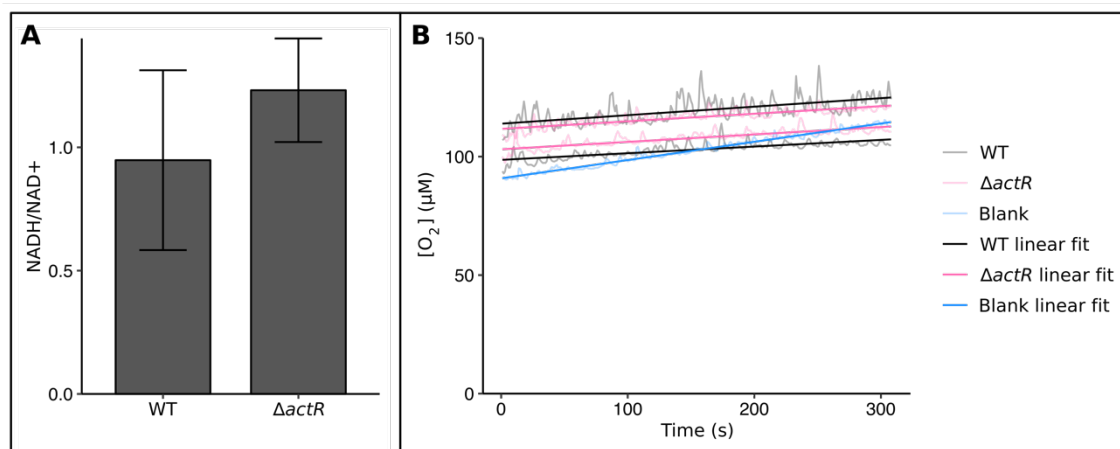

**Fig. S6: Inhibition of ATP synthesis does not necessarily correlate with PYO sensitivity.** Data in all panels is from the same experiment ( $n = 3$ ). **A)** Growth of WT and  $\Delta actR$  after 5 hrs of treatment with +/- 100  $\mu\text{M}$  DCCD combined with +/- 10  $\mu\text{M}$  PYO. The difference between the OD<sub>500</sub> at 5 hrs and initial OD<sub>500</sub> was taken as a proxy for growth. **B)** ATP levels after 5 hrs of treatment. **C)** Percent growth of each strain in 10  $\mu\text{M}$  PYO relative to its growth in 0  $\mu\text{M}$  PYO, with or without 100  $\mu\text{M}$  DCCD, after 5 hrs. \*  $p < 0.05$ , \*\*  $p < 0.01$ , \*\*\*  $p < 0.001$  (in **B**, Welch's  $t$ -test followed by the Benjamini-Hochberg procedure to control the false discovery rate; in **C**, linear regression with custom contrast matrix to specify comparisons between 0  $\mu\text{M}$  and 100  $\mu\text{M}$  DCCD conditions). Legend on the right applies to all panels.

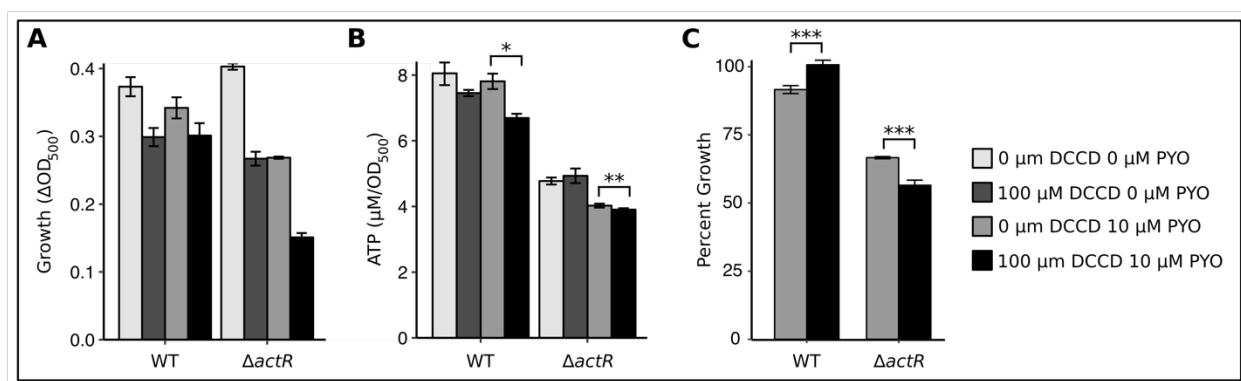

**Fig. S7: EPR spectra and DHE oxidation in the presence of PYO.** **A)** EPR spectra of 1) a cell-free sample containing 100  $\mu\text{M}$  PYO + 0.5% glucose (light gray); 2) WT + 100  $\mu\text{M}$  PYO + 0.5% glucose + exogenous superoxide dismutase (SOD) (100 units) (dark gray); 3)  $\Delta actR$  + 100  $\mu\text{M}$  PYO + 0.5% glucose (pink); 4) WT + 100  $\mu\text{M}$  PYO + 0.5% glucose (black). G = Gauss. EPR signal intensity is directly proportional to the quantity of radicals in a sample (Eaton *et al.*, 2010). All spectra were collected using 25 mM BMPO as the spin trap for superoxide and hydroxyl radical. The cell-free and SOD control spectra are single scans while the other two spectra are averages of six consecutive scans and are representative of at least three biological replicates. The complete loss of signal upon addition of cell-impermeable SOD indicates that the signal from PYO-treated cell suspensions represents only extracellular superoxide. **B)** Fluorescence (510ex/580em) of 15  $\mu\text{M}$  dihydroethidium (DHE) after 1 hr of incubation with 0  $\mu\text{M}$  or 10  $\mu\text{M}$  PYO in cell-free phosphate buffer. Increased fluorescence in the PYO-treated sample indicates abiotic DHE oxidation, suggesting that DHE oxidation would not be a reliable reporter for intracellular superoxide. RFU = relative fluorescence units.

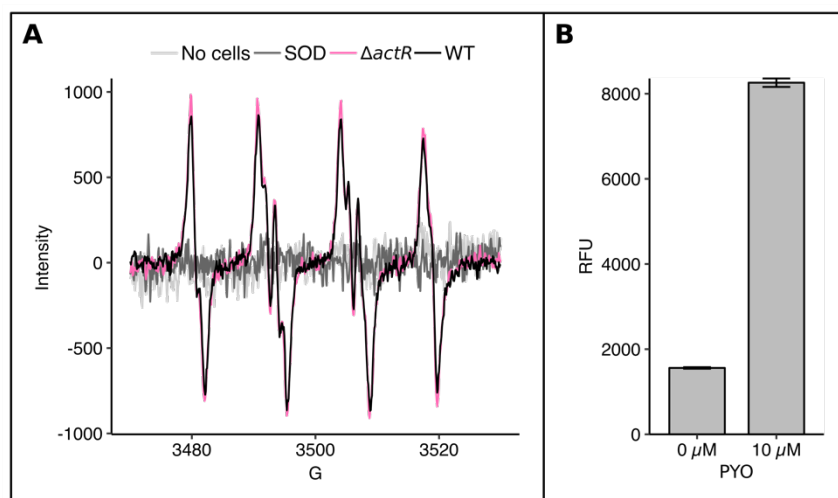

**Table S7: Primers used in this study.** Primers with “us” or “ds” were used to amplify the upstream or downstream flanking regions of the given gene, respectively, which were subsequently joined by overlap extension PCR and cloned into pNPTS138.

| Primer       | Sequence                                          | Cut site              |
|--------------|---------------------------------------------------|-----------------------|
| SS9arb1      | GACCACGAGACGCCACACTNNNNNNNNNNCATGC                |                       |
| Mar4         | TAGGGTTGAGTGTTGTTCCAGTT                           |                       |
| arb3         | GACCACGAGACGCCACACT                               |                       |
| Mar4-2       | TCACCGTCATGGTCTTTGTAGTC                           |                       |
| soxR-us-F    | GTAAAAATT- <u>GAATTC</u> -CACCGAAGAGCTGACCATCAAG  | EcoRI                 |
| soxR-us-R    | GAATAAGGGGCGGCTCAGCCGC-TCTGGCTCCTGCTTCCG          |                       |
| soxR-ds-F    | CGGAAGCAGGAGCCAGA-GCGGCTGAGCCGCCCTTATTC           |                       |
| soxR-ds-R    | GTAAAAATT- <u>ACTAGT</u> -CCGACCGAAGACGGCATATTCCG | SpeI                  |
| actS-us-F    | CTTGGTGCCATCATTCTCGAC                             | EcoRI<br>(downstream) |
| actS-us-R    | CGCTTCAACGTGGATGGTAAAG-CGTCTTCTCCTTTACCCTTTTC     |                       |
| actS-ds-F    | GAAAAGGGTAAAGGAGAAGACG-CTTTACCATCCACGTTGAAGCG     |                       |
| actS-ds-R    | GTAAAAATT- <u>ACTAGT</u> -TGCGCCGATGCATGTTG       | SpeI                  |
| actR-us-F    | GTAAAAATT- <u>GGATCC</u> -GCGTCGTCGCCAAGGAAATG    | BamHI                 |
| actR-usR     | CGCACTTTTACTGGAAATGCT-GTTTCCGGCCTTCCGGCAAC        |                       |
| actR-ds-F    | GTTGCCGGAAGGCCGGAAC-AGCATTTCCAGTAAAAGTGCG         |                       |
| actR-ds-R    | GTAAAAATT- <u>ACTAGT</u> -CGCCAAATTGTGCGAAGGAG    | SpeI                  |
| sodBI-us-F   | GTAAAAATT- <u>GGATCC</u> -AATGGCTGAATACGGTGC      | BamHI                 |
| sodBI-us-R   | GAAAAATTCCGTTCCGCAAGCC-GGTTTTTACTCCTTTTGCAGC      |                       |
| sodBI-ds-F   | GGCTTGGCGAACGGAATTTTTTC                           |                       |
| sodBI-ds-R   | GTAAAAATT- <u>ACTAGT</u> -GAATTGCTTGTCAGTGTG      | SpeI                  |
| sodBII-us-F  | GTAAAAATT- <u>GGATCC</u> -TCGAAACCGTGCTTCTGCGC    | BamHI                 |
| sodBII-us-R  | GGGTCGGTGGGGCTCAAA-GGGGTATTCTTTGTCAACTGTT         |                       |
| sodBII-ds-F  | AACAGTTGACAAAGGAATACCCC-TTGAGCCCCACCGACCC         |                       |
| sodBII-ds-R  | GTAAAAATT- <u>ACTAGT</u> -ACGCGGCGAGATCGTCGG      | SpeI                  |
| Atu0942-us-F | GTAAAAATT- <u>GAATTC</u> -CAAGGACGAACATCGCTGTG    | EcoRI                 |
| Atu0942-us-R | GGTCACTTTTCTGGAAATGCT-GCGGGCTTTTTTATCCGATG        |                       |
| Atu0942-ds-F | AGCATTTCCAGAAAAAGTGAACC                           |                       |
| Atu0942-ds-R | GTAAAAATT- <u>ACTAGT</u> -GATCGAAGTTGCCTCGTCAG    | SpeI                  |
| Atu2361-us-F | GTAAAAATT- <u>GGATCC</u> -CTACGAGCCGCAGAAATTTCG   | BamHI                 |
| Atu2361-us-R | CCCACCCACGCTGCGCC-GGAACGTCCTTCGATAGTGT            |                       |
| Atu2361-ds-F | ACACTATCGAAGGACGTTCC-GGCGCAGCGTGGGGTGGG           |                       |
| Atu2361-ds-R | GTAAAAATT- <u>ACTAGT</u> -GGAATAGAGTGCATCGGATTCC  | SpeI                  |
| mexF-us-F    | GTAAAAATT- <u>GAATTC</u> -TCAACCCGATCTATGCAAGC    | EcoRI                 |
| mexF-us-R    | GCGGTGGATGGGGTGC GGCG-ATCCAGTCCCTCTCCGGG          |                       |

|                  |                                                               |                                       |
|------------------|---------------------------------------------------------------|---------------------------------------|
| mexF-ds-F        | CGCCGCACCCCATCCACCGC                                          |                                       |
| mexF-ds-R        | GTAAAAATT- <u>ACTAGT</u> -GTTTTCCGTCCAACCTGCC                 | SpeI                                  |
| Atu5152-us-F     | GTAAAAATT- <u>GGATCC</u> -AGCCATTGGGATTGATGTCG                | BamHI                                 |
| Atu5152-us-R     | CCACGTCAAAGGAGGGCGTC-ATTCCCGACCGCACTTGGTG                     |                                       |
| Atu5152-ds-F     | CACCAAGTGC GGTCGGAAT-GACGCCCTCCTTTGACGTGG                     |                                       |
| Atu5152-ds-R     | GTAAAAATT- <u>ACTAGT</u> -CGTAGTGGTCATTGAGCTTGG               | SpeI                                  |
| Atu5305-us-F     | TGCAGACCAATGTC <u>GAATTC</u>                                  | EcoRI                                 |
| Atu5305-us-R     | GCATCCAACGGATCCACAT-GAGCCGCGACCGTCTTG                         |                                       |
| Atu5305-ds-F     | ATGTGGATCCGTTGGATGC                                           |                                       |
| Atu5305-ds-R     | GTAAAAATT- <u>ACTAGT</u> -GTAACGGTTGCGGCACATAG                | SpeI                                  |
| Atu4581-us-F     | GTAAAAATT- <u>GGATCC</u> -CACGGAAACGGCGTCAAC                  | BamHI                                 |
| Atu4581-us-R     | GGGAGAGAAAATCCCTAGTTGAG-ACCGCCATCGATCAGCCTG                   |                                       |
| Atu4581-ds-F     | CTCAACTAGGGATTTTCTCTCCC                                       |                                       |
| Atu4581-ds-R     | GTAAAAATT- <u>ACTAGT</u> -CCCGCGCCACAATATTTTC                 | SpeI                                  |
| Atu4582-us-F     | GTAAAAATT- <u>GGATCC</u> -TGTCCGAGGAGACGCTGAAG                | BamHI                                 |
| Atu4582-us-R     | ATGAGACATGCAGTGCCGGG-GGGGATGCTCAAATGGAGTTG                    |                                       |
| Atu4582-ds-F     | CCCGGCACTGCATGTCTCAT                                          |                                       |
| Atu4582-ds-R     | GTAAAAATT- <u>ACTAGT</u> -GCCGCCTTTCTAAATGTCCG                | SpeI                                  |
| Atu4741-us-F     | GTAAAAATT- <u>GGATCC</u> -GAAGTCTGGAAGAAAACCG                 | BamHI                                 |
| Atu4741-us-R     | CTGTGGCATATGCCTCACCT-AAACCACCGGCTCTAGACAG                     |                                       |
| Atu4741-ds-F     | AGGTGAGGCATATGCCACAG                                          |                                       |
| Atu4741-ds-R     | GTAAAAATT- <u>ACTAGT</u> -CACAGGCATAAACGGCAACG                | SpeI                                  |
| Atu4742-us-F     | GTAAAAATT- <u>GAATTC</u> -ATTTCCAACAACAGGCACGG                | EcoRI                                 |
| Atu4742-us-R     | CGACTGAACTTCCGCTGCCA-CGTTATTCCGTTGCAATGG                      |                                       |
| Atu4742-ds-F     | TGGCAGCGGAAGTTCAGTCG                                          |                                       |
| Atu4742-ds-R     | GTAAAAATT- <u>ACTAGT</u> -CATGTTCTGGCTCGTCTTCAG               | SpeI                                  |
| CyoABCD-us-F     | GTAAAAATT- <u>GGATCC</u> -CGATCTGGAGGAAGATCAGC                | BamHI                                 |
| CyoABCD-us-R     | GCCGCTGATTTATCGCTGC-GACGACCAGATTGCAGCCGC                      |                                       |
| CyoABCD-ds-F     | GCAGCGATAAATCAGCGGC                                           |                                       |
| CyoABCD-ds-R     | GTAAAAATT- <u>ACTAGT</u> -GGTTCTAAGGAAAAGCCCACC               | SpeI                                  |
| pSRK-actR-F      | GTAAAAATT- <u>CAT-ATGA</u> AAGATTGAAGACCAGACCC                | NdeI                                  |
| pSRK-actR-R      | GTAAAAATT- <u>GCTAGC</u> -TCACTTCGGAGCGCGTTTC                 | NheI                                  |
| pSRK-soxR-F      | GTAAAAATT- <u>CAT-ATGGA</u> AAATACCATCTTCAAACAC               | NdeI                                  |
| pSRK-soxR-R      | GTAAAAATT- <u>GCTAGC</u> -TTATTCAGCGGAGACGAGG                 | NheI                                  |
| Cyo-pSRK-Gib-F   | GAATTGTGAGCGGATAACAATTTACACAGGAAACAGCATATGAACCCTT<br>CGGGCGAC | Used with<br>NdeI/NheI-<br>cut pSRKKm |
| surfl-pSRK-Gib-R | CCTGAACCGACGACCGGGTCAATTTGCTTTTCAATTGTCAATCAGCATCC<br>CGTTTCG | Used with<br>NdeI/NheI-<br>cut pSRKKm |
| pSRK-Cyd-F       | GTAAAAATT- <u>CAT-ATGCT</u> GCCGGCGCTGCTCTG                   | NdeI                                  |

|                |                                                  |      |
|----------------|--------------------------------------------------|------|
| pSRK-Atu8036-R | GTAAAAATT- <u>GCTAGC</u> -TCATTTTTCCGGCTTCGCTTCG | NheI |
| soxR-qpcr-F    | CTGTCGGTGGGGGATGTTG                              |      |
| soxR-qpcr-R    | GATGATAACGACGCTGGTTGC                            |      |
| sodBII-qpcr-F  | CTTCTGGGAGATCATGGGGC                             |      |
| sodBII-qpcr-R  | CGAGGGCGAAATTCTGCTTG                             |      |
| Atu0942-qpcr-F | GCGGGTTTTTATAGCTGGGC                             |      |
| Atu0942-qpcr-R | AGATGAGGCAGCACAGAAGC                             |      |
| Atu2361-qpcr-F | TTTTACACCATCCCCTCGCA                             |      |
| Atu2361-qpcr-R | CTGCCAGATTGAAGATGCCG                             |      |
| mexE-qpcr-F    | CGCTGGTGAAGGAAGGTGAC                             |      |
| mexE-qpcr-R    | CACGGTCGAGTTCCGTCTTT                             |      |
| mexF-qpcr-F    | ACCGACGCCTATGACATCAC                             |      |
| mexF-qpcr-R    | TAATCACCTGCGCCGAAGAC                             |      |
| Atu5152-qpcr-F | GGTTGGAGCCGTATTGTTGC                             |      |
| Atu5152-qpcr-R | CCACAGAATGAAACCCAGCG                             |      |
| Atu5305-qpcr-F | CCATAGCGAGCCCAAATCCA                             |      |
| Atu5305-qpcr-R | AGTCACCTCAGTCTCGTTGC                             |      |
| Atu4741-qpcr-F | GAAGCCACGGAAAAATCGTCG                            |      |
| Atu4741-qpcr-R | CATCTCACCGTCCCCTGAAC                             |      |
| Atu4742-qpcr-F | CCATCAGGCAGAATCCCGAC                             |      |
| Atu4742-qpcr-R | CACTGCCACGCCTTCTATCC                             |      |
| CyoA-qpcr-F    | GAGATGCCGTCGTAGACACC                             |      |
| CyoA-qpcr-R    | AACTCCTTCTTCGTTCCCGC                             |      |
| CydA-qpcr-F    | CGAAGCAATGTGGGAAACCG                             |      |
| CydA-qpcr-R    | TTTGCGTATCAAGCGAACGG                             |      |
| Atu4316-qpcr-F | TGGCATAAACGCCGATGACT                             |      |
| Atu4316-qpcr-R | CCAGATCATCACGCTCTCCC                             |      |
| Atu1475-qpcr-F | AACGCCTGAACCCGATTTTG                             |      |
| Atu1475-qpcr-R | GTCCGTATGGAACGTCGTGA                             |      |
| Atu4895-qpcr-F | GGGCTCACTGCAAAACCAAC                             |      |
| Atu4895-qpcr-R | TCCCAAATGCCAAGAGCGAC                             |      |

**Table S8: Strains and plasmids used in this study.** All *A. tumefaciens* mutants were constructed from the NT1 parent strain.

| Strain/Plasmid               | Notes                                                                                              | Reference/Source                                         |
|------------------------------|----------------------------------------------------------------------------------------------------|----------------------------------------------------------|
| <b><i>E. coli</i></b>        |                                                                                                    |                                                          |
| DH10b                        | Cloning strain                                                                                     | Invitrogen                                               |
| β2155                        | $\Delta dapA::erm$ (Erm <sup>r</sup> ) $pir::RP4$ [ $::kan$ (Km <sup>r</sup> ) from SM10]          | (Dehio and Meyer, 1997)                                  |
| <b><i>A. tumefaciens</i></b> |                                                                                                    |                                                          |
| NT1                          | non-pathogenic derivative of strain C58; carries pDCI41E33 (plasmid with <i>traG::lacZ</i> fusion) | (Shaw <i>et al.</i> , 1997; Watson <i>et al.</i> , 1975) |
| <i>soxR</i>                  | <i>mariner</i> transposon insertion in <i>soxR</i>                                                 | This study                                               |
| <i>actS</i>                  | <i>mariner</i> transposon insertion in <i>actS</i>                                                 | This study                                               |
| <i>rpoH</i>                  | <i>mariner</i> transposon insertion in <i>rpoH</i>                                                 | This study                                               |
| Atu1426                      | <i>mariner</i> transposon insertion in Atu1426                                                     | This study                                               |
| Atu3738                      | <i>mariner</i> transposon insertion in Atu3738                                                     | This study                                               |
| <i>pykA</i>                  | <i>mariner</i> transposon insertion in <i>pykA</i>                                                 | This study                                               |
| Atu2584                      | <i>mariner</i> transposon insertion in Atu2584                                                     | This study                                               |
| Atu2590                      | <i>mariner</i> transposon insertion in Atu2590                                                     | This study                                               |
| Atu2591                      | <i>mariner</i> transposon insertion in Atu2591                                                     | This study                                               |
| Atu2592                      | <i>mariner</i> transposon insertion in Atu2592                                                     | This study                                               |
| Atu2577-1                    | <i>mariner</i> transposon insertion in Atu2577                                                     | This study                                               |
| Atu2577-2                    | <i>mariner</i> transposon insertion in Atu2577                                                     | This study                                               |
| $\Delta soxR$                | clean deletion of <i>soxR</i> coding sequence                                                      | This study                                               |
| $\Delta actS$                | clean deletion of <i>actS</i> coding sequence                                                      | This study                                               |
| $\Delta actR$                | clean deletion of <i>actR</i> coding sequence                                                      | This study                                               |
| $\Delta actR/\Delta soxR$    | clean deletion of <i>actR</i> and <i>soxR</i> coding sequences                                     | This study                                               |
| $\Delta sodBI$               | clean deletion of <i>sodBI</i> coding sequence                                                     | This study                                               |
| $\Delta sodBII$              | clean deletion of <i>sodBII</i> coding sequence                                                    | This study                                               |
| $\Delta sodBI/\Delta sodBII$ | clean deletion of <i>sodBI</i> and <i>sodBII</i> coding sequences                                  | This study                                               |
| $\Delta soxR/\Delta sodBI$   | clean deletion of <i>soxR</i> and <i>sodBI</i> coding sequences                                    | This study                                               |
| $\Delta$ Atu0942             | clean deletion of Atu0942 coding sequence                                                          | This study                                               |
| $\Delta$ Atu2361             | clean deletion of Atu2361 coding sequence                                                          | This study                                               |
| $\Delta mexF$                | clean deletion of <i>mexF</i> coding sequence                                                      | This study                                               |
| $\Delta$ Atu5152             | clean deletion of Atu5152 coding sequence                                                          | This study                                               |
| $\Delta$ Atu5305             | clean deletion of Atu5305 coding sequence                                                          | This study                                               |
| $\Delta$ Atu4581             | clean deletion of Atu4581 coding sequence                                                          | This study                                               |
| $\Delta$ Atu4582             | clean deletion of Atu4582 coding sequence                                                          | This study                                               |
| $\Delta$ Atu4741             | clean deletion of Atu4741 coding sequence                                                          | This study                                               |
| $\Delta$ Atu4742             | clean deletion of Atu4742 coding sequence                                                          | This study                                               |
| $\Delta cyo$                 | clean deletion of cytochrome <i>o</i> oxidase biosynthesis operon                                  | This study                                               |

| Plasmid              |                                                                                                                                        |                                               |
|----------------------|----------------------------------------------------------------------------------------------------------------------------------------|-----------------------------------------------|
| pSC189               | R6K suicide plasmid carrying <i>mariner</i> transposon with hyperactive transposase; Ap <sup>R</sup> Km <sup>R</sup>                   | (Chiang and Rubin, 2002)                      |
| pNPTS138             | ColE1 suicide plasmid; <i>sacB</i> ; Km <sup>R</sup>                                                                                   | Constructed by M.R.K. Alley; gift of C. Fuqua |
| pNPTS138::soxRdel    | pNPTS138 carrying flanking regions of <i>soxR</i> for clean deletion                                                                   | This study                                    |
| pNPTS138::actSdel    | pNPTS138 carrying flanking regions of <i>actS</i> for clean deletion                                                                   | This study                                    |
| pNPTS138::actRdel    | pNPTS138 carrying flanking regions of <i>actR</i> for clean deletion                                                                   | This study                                    |
| pNPTS138::sodBIdel   | pNPTS138 carrying flanking regions of <i>sodBI</i> for clean deletion                                                                  | This study                                    |
| pNPTS138::sodBIIdel  | pNPTS138 carrying flanking regions of <i>sodBII</i> for clean deletion                                                                 | This study                                    |
| pNPTS138::Atu0942del | pNPTS138 carrying flanking regions of <i>Atu0942</i> for clean deletion                                                                | This study                                    |
| pNPTS138::Atu2361del | pNPTS138 carrying flanking regions of <i>Atu2361</i> for clean deletion                                                                | This study                                    |
| pNPTS138::mexFdel    | pNPTS138 carrying flanking regions of <i>mexF</i> for clean deletion                                                                   | This study                                    |
| pNPTS138::Atu5152del | pNPTS138 carrying flanking regions of <i>Atu5152</i> for clean deletion                                                                | This study                                    |
| pNPTS138::Atu5305del | pNPTS138 carrying flanking regions of <i>Atu5305</i> for clean deletion                                                                | This study                                    |
| pNPTS138::Atu4581del | pNPTS138 carrying flanking regions of <i>Atu4581</i> for clean deletion                                                                | This study                                    |
| pNPTS138::Atu4582del | pNPTS138 carrying flanking regions of <i>Atu4582</i> for clean deletion                                                                | This study                                    |
| pNPTS138::Atu4741del | pNPTS138 carrying flanking regions of <i>Atu4741</i> for clean deletion                                                                | This study                                    |
| pNPTS138::Atu4742del | pNPTS138 carrying flanking regions of <i>Atu4742</i> for clean deletion                                                                | This study                                    |
| pNPTS138::cyoABCDdel | pNPTS138 carrying flanking regions of <i>cyoABCD</i> for clean deletion                                                                | This study                                    |
| pLacZ                | alias for pSRKKm; broad host range P <sub>lac</sub> vector; <i>lacI</i> <sup>Q</sup> ; Km <sup>R</sup>                                 | (Khan <i>et al.</i> , 2008)                   |
| pActR                | pSRKKm carrying P <sub>lac</sub> - <i>actR</i>                                                                                         | This study                                    |
| pSoxR                | pSRKKm carrying P <sub>lac</sub> - <i>soxR</i>                                                                                         | This study                                    |
| pCyo                 | pSRKKm carrying P <sub>lac</sub> - <i>cyoABCD-surfI</i> ( <i>surfI</i> is co-transcribed with the other <i>cyo</i> genes)              | This study                                    |
| pCyd                 | pSRKKm carrying P <sub>lac</sub> - <i>cydDCAB</i> - <i>Atu8036</i> ( <i>Atu8036</i> is co-transcribed with the other <i>cyd</i> genes) | This study                                    |

### Supplemental References

- Chiang, S. L., and Rubin, E. J. (2002). Construction of a *mariner*-based transposon for epitope-tagging and genomic targeting. *Gene*, 296, 179–185. [https://doi.org/10.1016/S0378-1119\(02\)00856-9](https://doi.org/10.1016/S0378-1119(02)00856-9)
- Dehio, C., and Meyer, M. (1997). Maintenance of broad-host-range incompatibility group P and group Q plasmids and transposition of Tn5 in *Bartonella henselae* following conjugal plasmid transfer from *Escherichia coli*. *Journal of Bacteriology*, 179(2), 538–540.
- Eaton, G. R., Eaton, S. S., Barr, D. P., and Weber, R. T. (2010). *Quantitative EPR*. New York: SpringerWienNewYork.
- Khan, S. R., Gaines, J., Roop, R. M., and Farrand, S. K. (2008). Broad-host-range expression vectors with tightly regulated promoters and their use to examine the influence of TraR and TraM expression on Ti plasmid quorum sensing. *Applied and Environmental Microbiology*, 74(16), 5053–5062. <https://doi.org/10.1128/AEM.01098-08>
- Shaw, P. D., Ping, G., Daly, S. L., Cha, C., Cronan Jr., J. E., Rinehart, K. L., and Farrand, S. K. (1997). Detecting and characterizing *N*-acyl-homoserine lactone signal molecules by thin-layer chromatography. *Proceedings of the National Academy of Sciences*, 94, 6036–6041. <https://doi.org/10.1073/PNAS.94.12.6036>
- Tjaden, B. (2015). De novo assembly of bacterial transcriptomes from RNA-seq data. *Genome Biology*, 16. <https://doi.org/10.1186/s13059-014-0572-2>
- Watson, B., Currier, T. C., Gordon, M. P., Chilton, M.-D., and Nester, E. W. (1975). Plasmid required for virulence of *Agrobacterium tumefaciens*. *Journal of Bacteriology*, 123(1), 255–264.
